# Supplementary material for: USA-Mexico border wall impedes wildlife movement
Source: Frontiers journal article supplement (doi:10.3389/fevo.2024.1487911), 2024-11-21
Supplement: Table_1.docx [file Table_1.docx]

Supplementary Material

# Supplementary Data

Example videos of wildlife interacting with border barriers can be viewed here:

https://skyislandalliance.imagerelay.com/fl/73d75eb283174ad08407096e32a6e9a6

# Supplementary Figures and Tables

Table S1. Camera distribution along border barriers on 163.5 km of the USA-Mexico border in southern Arizona, USA and northern Sonora, MX between August 2022 and July 2024. Initial camera install is the earliest date a camera was installed along each barrier type. Average duration of camera is the average number of days each camera was active along the barrier. Total camera-days is calculated as the number of cameras multiplied by the number of days the cameras were active. Mean daily crossings is the average of crosses per camera-day for all cameras at each barrier type. Mean daily activity is the average of all wildlife events per camera-day for all cameras at each barrier type. SE is standard error.

| Barrier Type | Camera Locations | Initial Camera Install | Average Duration of Camera | Total Camera-Days | Mean daily crossings | Mean daily activity |
| --- | --- | --- | --- | --- | --- | --- |
| Border Wall | 7 | 01-Aug-22 | 433 | 3031 | 0.015, SE = 0.004 | 0.19, SE = 0.03 |
| Small Wildlife Passage | 11 | 24-Aug-22 | 339 | 3731 | 0.25, SE = 0.05 | 0.60, SE = 0.08 |
| Vehicle Barrier | 18 | 28-Oct-22 | 237 | 4274 | 0.20, SE = 0.03 | 0.32, SE = 0.04 |
